# Supplementary material for: Unveiling the ultralow in-plane thermal conductivity in 2D organic–inorganic hybrid perovskite (EA) 2 PbI 4 single crystals
Source: Royal Society of Chemistry journal article supplement (doi:10.1039/d4ta05298f), 2024-01-01
Supplement: d4ta05298f1.pdf [file d4ta05298f1.pdf]

## Supporting Information

### Unveiling the ultralow in-plane thermal conductivity in 2D organic-inorganic hybrid perovskite (EA)<sub>2</sub>PbI<sub>4</sub> single crystal

Pai-Chun Wei,<sup>a,\*</sup> Nashim Aktar,<sup>a</sup> Jia-Kai Hu,<sup>a</sup> Cheng-Chieh Wu,<sup>a</sup> Yung-Hsiang Tung,<sup>b</sup> Chun-Chuen Yang,<sup>b</sup> Andrea Giugni<sup>c</sup>

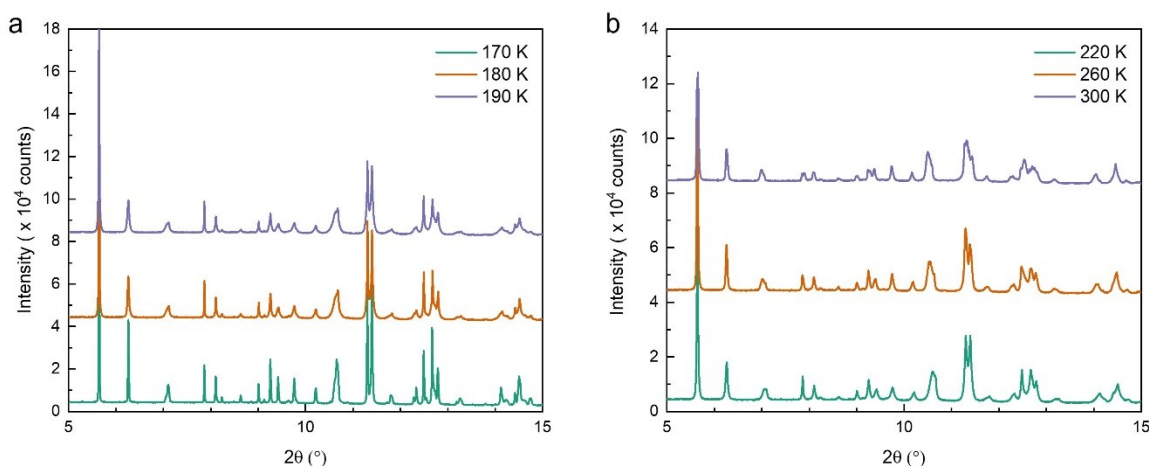

**Fig. S1.** The synchrotron powder XRD patterns of EA<sub>2</sub>PbI<sub>4</sub>, recorded at (a) 170 K, 180 K, and 190 K (b) 220 K, 260 K, and 300 K.

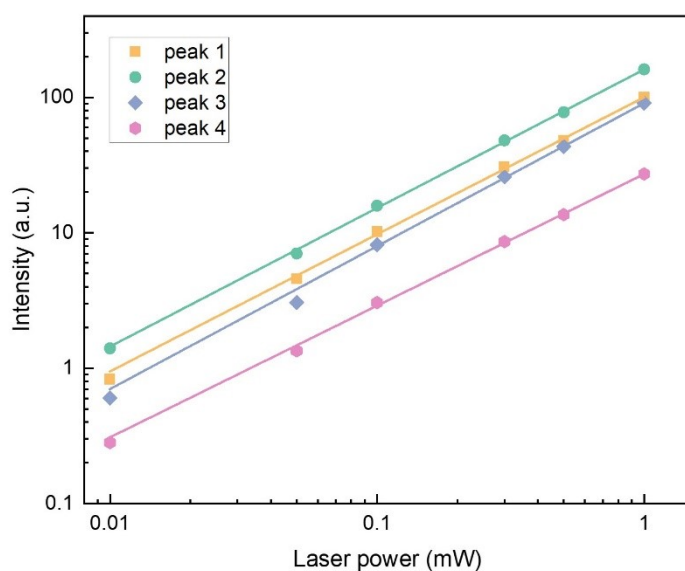

**Fig. S2.** Power dependence of photoluminescence (PL) peaks measured at 15 K. The intensities of the four PL peaks ( $I_{PL}$ ) follow the relationship  $I_{PL} \propto P^n$ , with  $n$  values of 1.01, 1.02, 1.05, and 0.97 for peaks 1 through 4, respectively.

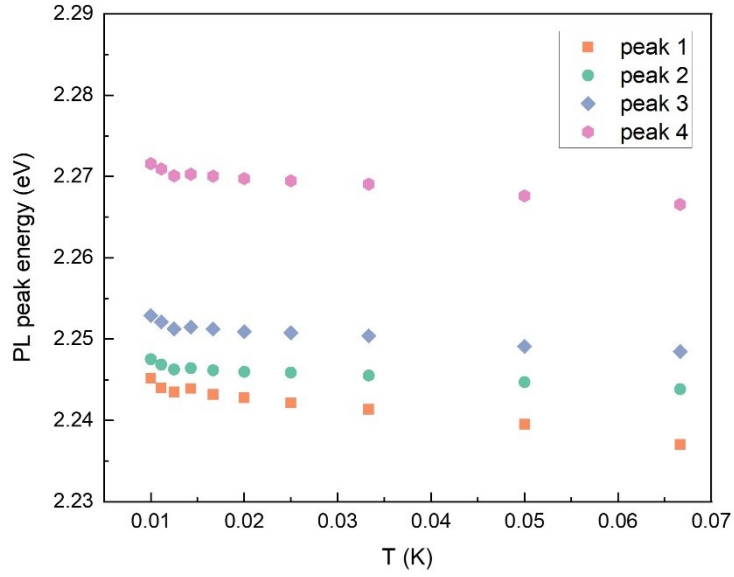

**Fig. S3.** The PL peak energies of the four peaks of EA<sub>2</sub>PbI<sub>4</sub> plotted as a function of 1/T.

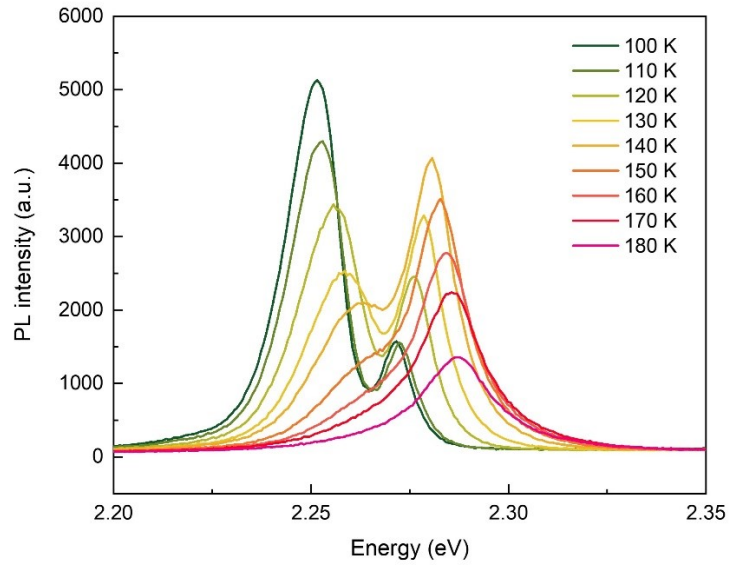

**Fig. S4.** Temperature-dependent evolution of PL peaks of EA<sub>2</sub>PbI<sub>4</sub> within the range of 100 K to 180 K, illustrating the shift and merging of peaks.
